# Supplementary material for: Stream laws in analog tectonic-landscape models
Source: Copernicus journal article supplement (doi:10.5194/esurf-11-731-2023), 2023-08-02
Supplement: Supplementary file 1 [file esurf-11-731-2023-supplement.pdf]

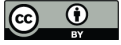

*Supplement of*

## **Stream laws in analog tectonic-landscape models**

**Riccardo Reitano et al.**

*Correspondence to:* Riccardo Reitano (r.reitano@gmail.com)

The copyright of individual parts of the supplement might differ from the article licence.

## **Contents of this file**

Tables S1

Figures S1, S2

## **Additional Supporting Information (Files uploaded separately)**

Raw data: DEMs, and pictures of models: <https://doi.org/10.5880/fidgeo.2022.029>

## **Introduction**

This supplementary material contains

- Description of channel extraction and channel metrics
- Description of the calculation of the eroded volumes.
- Description of acquisition time methods
- Table S1, where we present the models and the applied boundary conditions
- Figure S1, in which we describe the experimental apparatus
- Figure S2, in which we show the streams longitudinal profiles of streams for every model
- Data set, in which we uploaded the raw DEMs and picture of the models presented in the main text.

## **Channels extraction and channel metrics**

Channels are extracted from every basin at every time step using the function “klargestconncomps” implemented in TopoToolBox (Schwanghart and Scherler, 2014). In doing so, channel width is not considered, and channels are computed pixel by pixel considering elevation and slope difference between neighbors pixels, all having a common basin outlet and watershed manually selected by the user. From these channels, values of  $k_s$  and  $\theta$  are computed by power law regression between local slope and area (slope-area regression).

## **Eroded volumes**

We create a numeric regular grid on the model surface. The eroded volumes are extracted calculating the cumulative difference in elevation ( $\Delta z$ ) of the same cells at consecutive times. The cells dimension is function of the horizontal resolution of the laser scan (here 0.05 mm). Knowing the cell dimensions and the corresponding  $\Delta z$ , is it possible to obtain the total volume of eroded material at every time step.

## **Acquisition time**

Data have been collected at specific times. These times are (min): 15, 30, 45, 60, 90, 120, 150, 180, 240, 300. These times correspond to the moments when laser scans have been taken.

| Model name | Imposed regional slope (degrees) | Rainfall rate (mm h <sup>-1</sup> ) |
|------------|----------------------------------|-------------------------------------|
| mod1009    | 10                               | 9                                   |
| mod1022    | 10                               | 22                                  |
| mod1070    | 10                               | 70                                  |
| mod1509    | 15                               | 9                                   |
| mod1522    | 15                               | 22                                  |
| mod1570    | 15                               | 70                                  |
| mod2009    | 20                               | 9                                   |
| mod2022    | 20                               | 22                                  |
| mod2070    | 20                               | 70                                  |

**Table S1.** Models name and relative boundary conditions applied.

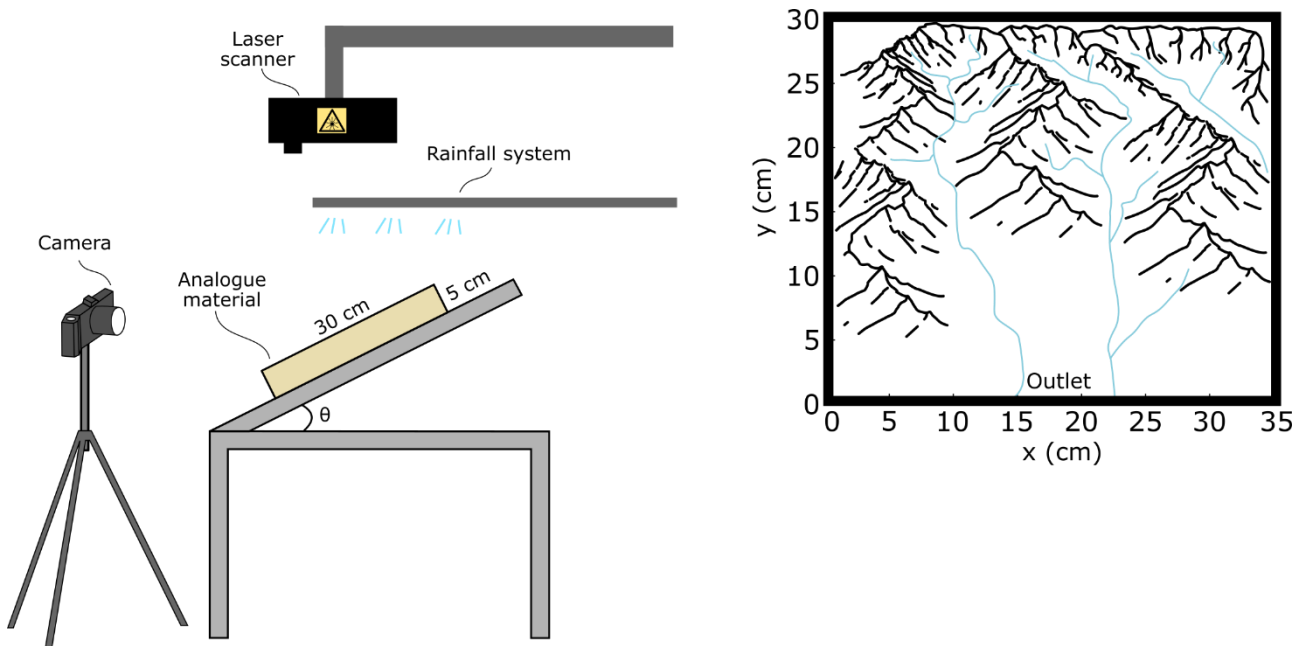

**Figure S1.** Schematic representation of the experimental setup. A Plexiglass box (30×35×5 cm<sup>3</sup>) lays on a reclinable table and is filled with analogue material. The rainfall system (commercial sprinklers) provides rainfall over the model surface. A single camera and a high-definition laser scan provide records for the experiments. Modified after Reitano et al. (2020).

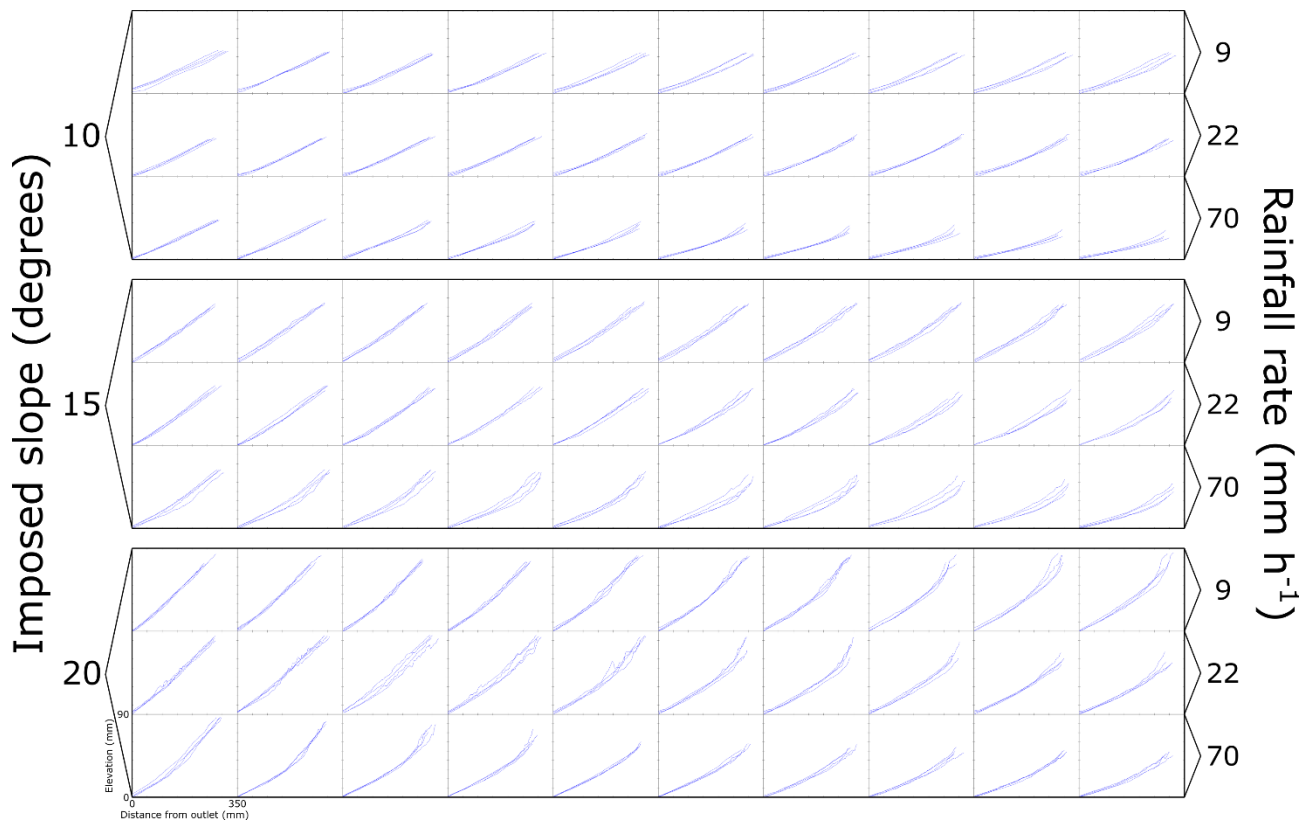

**Figure S2.** Streams longitudinal profiles of the four rivers described in the main text, for every model at every time step.

## References

- Reitano, R., Faccenna, C., Funicello, F., Corbi, F., & Willett, S. D. (2020). Erosional response of granular material in landscape models. *Earth Surf. Dynam.*, 8(4), 973–993. <https://doi.org/10.5194/esurf-8-973-2020>
- Reitano, Riccardo; Clementucci, Romano; Conrad, Ethan M.; Corbi, Fabio; Lanari, Riccardo; Faccenna, Claudio; Bazzucchi, Chiara (2022): Raw data (pictures, DEMs, .mat files) about analogue landscapes evolution. GFZ Data Services. <https://doi.org/10.5880/fidgeo.2022.029>
- Schwanghart, W. and Scherler, D.: Short Communication: TopoToolbox 2 - MATLAB-based software for topographic analysis and modeling in Earth surface sciences, *Earth Surf. Dyn.*, 2(1), 1–7, doi:10.5194/esurf-2-1-2014, 2014.
